# Supplementary material
Source: Springer Nature journal article supplement (https://www.springermedizin.de/resource/supplementary/12885_2012_3845_MOESM4_ESM.pdf/9464516)

**A**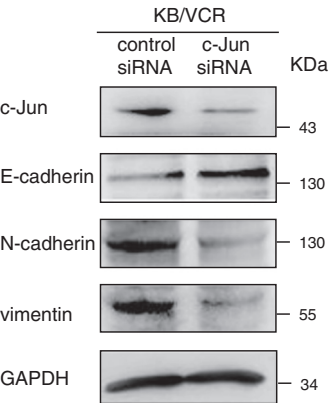**B**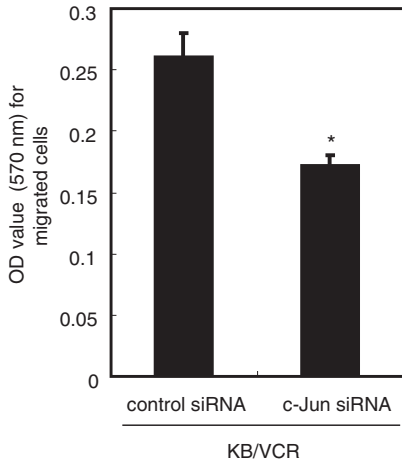**C**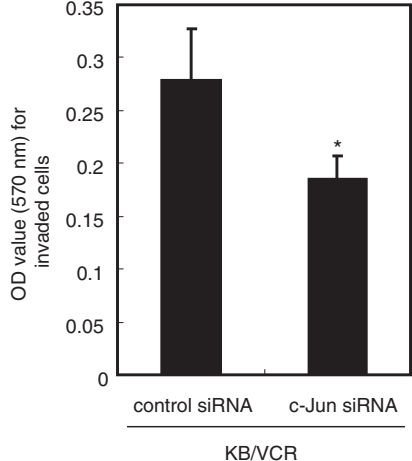

Supplement: MOESM4 [file 9464516]
